# Supplementary material
Source: publisher figshare collection journal article supplement (https://geolsoc.figshare.com/ndownloader/files/5424407)
Supplement: Supplementary file 1 [file 5424407]

LA-ICPMS data from F1342
								Corrected isotope ratios															Dates (Ma)											207-corrected		208-corrected			Concentrations (ppm)
		U	Th	Pb*		206Pb		208Pb*	�2s	206Pb*	�2s	207Pb*	�2s	206Pb*	�2s	error	238U	�2s	207Pb*	�2s	error		208Pb*	�2s	207Pb*	�2s	207Pb*	�2s	206Pb*	�2s		%		206Pb*	�2s	206Pb*	�2s
Analysis	Notes	ppm	ppm	ppm	Th/U	204Pb		232Th	(%)	207Pb*	(%)	235U*	(%)	238U	(%)	corr.	206Pb*	(%)	206Pb*	(%)	corr.		232Th	(Ma)	206Pb*	(Ma)	235U	(Ma)	238U*	(Ma)		disc.		238U*	(Ma)	238U*	(Ma)		P	Ti	Y	Zr	Nb	La	Ce	Pr	Nd	Sm	Eu
F1342 S 1266 3/2/2014 6:59:21 PM (Run: 1)	high U signal variance	118.6622637	69.70683321	89.06480605		2530.13736		0.165921792	7.067686297	4.919629676	2.587614055	15.21210853	6.3	0.542775896	5.7	0.910848601	1.842381003	5.710425571	0.203267332	2.6	2.40432E-16		3103	203	2853	42	2829	60	2795	130		2		2828.681542	190.9636519	2776.323519	490.2092836
F1342 S 1260 3/2/2014 6:49:08 PM (Run: 1)		95.46954034	49.93842718	73.86644926	0.523082305	2638.151657		0.173930767	6.906203745	5.102232426	2.741692534	15.42644389	6.4	0.570853657	5.8	0.90515543	1.751762448	5.838085732	0.195992639	2.7	2.21958E-16		3241	207	2793	45	2842	62	2911	137		-4		2841.804364	207.4742784	2893.995018	702.9796801		202	12.24	520	480680.3808	4.04		10.33	0.04	1.28	2.03	0.21
F1342 S 1277 3/2/2014 7:28:45 PM (Run: 1)		34.35331988	30.56914687	25.08667785	0.889845493	730.3193634		0.137162906	7.252844484	5.281411451	2.078888682	13.35029385	3.6	0.511375071	3.0	0.818042061	1.955511827	2.956782646	0.189343324	2.1	0		2598	177	2736	34	2705	34	2662	64		3		2704.844517	90.28766418	2668.7451	700.5913831		181	15.59	366	553226.5228	0.52		14.57	0.03	1.47	3.01	0.78
F1342 S 1225 3/2/2014 5:28:11 PM (Run: 1)	high U signal variance	219.7774271	156.7267629	129.4473076		42178.09455		0.139690261	7.305169466	6.275419219	1.698992044	9.274420522	4.9	0.422112538	4.6	0.93754814	2.369036475	4.579161717	0.159351904	1.7	-2.28325E-16		2643	181	2449	29	2365	45	2270	88		7		2365.784451	107.4672068	2238.819955	537.8430401
F1342 S 1285 3/2/2014 7:42:21 PM (Run: 1)	high U signal variance	25.46254916	34.71005315	12.96120727		2761.273672		0.091448005	8.621999975	8.573711303	4.062289447	5.535669288	7.3	0.344221282	6.1	0.832524814	2.905108001	6.104750017	0.116635604	4.1	0		1769	146	1905	73	1906	63	1907	101		0		1906.149421	115.3404014	1932.393285	1729.52897
F1342 S 1228 3/2/2014 5:40:22 PM (Run: 1)		62.31292946	60.75548766	31.0826547	0.975006121	5422.685185		0.110615352	9.058021877	8.681882222	2.949016626	5.567738146	5.2	0.350583455	4.3	0.827061101	2.852387883	4.339022835	0.115182396	2.9	1.38823E-16		2121	182	1883	53	1911	45	1937	73		-3		1911.005444	83.63270025	1914.340631	863.1944093		166	8.93	481	495225.7888	1.11		19.20	0.07	1.74	4.02	1.14
F1342 S 1247 3/2/2014 6:23:23 PM (Run: 1)	high U signal variance	80.15761679	89.5634578	37.84137606	1.117341825	45163.33539		0.107233786	7.970129007	8.696761169	3.336105723	5.008990524	6.8	0.315941357	5.9	0.869893554	3.165144348	5.883666772	0.114985335	3.3	0		2059	156	1880	60	1821	57	1770	91		6		1821.087029	101.6326624	1725.776392	1190.041168		206	10.36	533	447287.6659	1.59		23.31	0.05	1.40	2.91	0.50
F1342 S 1246 3/2/2014 6:14:37 PM (Run: 1)	high U signal variance	50.51080707	40.54127648	22.1375443	0.802625791	2278.585431		0.109531439	9.326732736	8.721163601	3.522688755	4.969331566	7.1	0.314319362	6.1	0.866376871	3.181477574	6.111398921	0.114663598	3.5	1.65023E-16		2101	186	1875	64	1814	60	1762	94		6		1814.370621	105.0343897	1726.228685	910.0699325		182	10.38	390	473101.8129	1.60		11.96	0.02	0.27	1.58	0.09
F1342 XS 1310 3/2/2014 8:43:01 PM (Run: 1)		81.1859928	59.77853896	35.9647169	0.73631592	9764.900152		0.081861761	7.835049399	8.802102519	2.546958245	5.383413407	5.3	0.343670994	4.7	0.878174657	2.909759672	4.675907545	0.11360922	2.5	1.49157E-16		1590	120	1858	46	1882	46	1904	77		-2		1882.117319	88.2060889	1932.953276	1280.714845		450	7.93	1555	619109.8546	1.56		3.17	0.04	1.47	3.66	0.90
F1342 S 1224 3/2/2014 5:26:28 PM (Run: 1)		84.89768164	74.5015805	36.56855272	0.877545524	19504.3972		0.10477216	7.80765849	8.881151476	1.86098206	4.727478711	5.0	0.304507213	4.7	0.928513283	3.283994458	4.653784984	0.112598012	1.9	-2.05108E-16		2014	150	1842	34	1772	42	1714	70		7		1772.415199	77.38990666	1678.400603	1082.078057		270	11.77	806	472490.8873	1.20	0.05	5.54	0.26	2.28	5.74	0.83
F1342 XS 1298 3/2/2014 8:15:23 PM (Run: 1)		87.56720925	76.00121891	38.96967386	0.867918706	5578.546458		0.08596823	7.955655171	8.929453475	2.116639737	5.143527924	6.2	0.333107726	5.9	0.940687867	3.002031839	5.868712998	0.111988937	2.1	-2.86003E-16		1667	127	1832	38	1843	53	1853	95		-1		1843.277747	107.1086717	1874.104039	1040.372794		687	7.18	1715	575174.6241	1.36		8.34	0.11	1.64	5.07	1.26
F1342 S 1283 3/2/2014 7:38:57 PM (Run: 1)		167.7254685	79.45012415	63.0191814	0.473691472	7598.535105		0.076418531	11.14170626	8.951520143	1.807932924	4.704232545	5.5	0.305410737	5.2	0.944960204	3.274279125	5.22158154	0.111712869	1.8	-1.88168E-16		1488	160	1827	33	1768	46	1718	79		6		1768.243795	87.12120084	1731.639994	602.9969943		852	14.19	2379	611155.1276	1.32		3.46	0.12	2.24	5.34	0.69
F1342 XS 1306 3/2/2014 8:29:00 PM (Run: 1)		240.1904378	297.804555	107.0506061	1.239868489	9057.788889		0.078919536	6.833877853	9.057395255	1.922785086	4.768653373	4.5	0.313254848	4.1	0.906078549	3.192288983	4.117596635	0.110407018	1.9	0		1535	101	1806	35	1779	38	1757	63		3		1779.509474	70.63946978	1794.175565	1610.11554		263	5.80	1117	608806.8201	3.90		15.34	0.03	1.03	3.31	0.26
F1342 M 1209 3/2/2014 4:57:12 PM (Run: 1)		153.1761693	83.73640129	63.27981035	0.54666729	2333.049962		0.113363661	7.044297239	9.140845344	1.269903401	4.77434738	4.9	0.316518502	4.8	0.96621762	3.159372973	4.760852496	0.109399072	1.3	0		2170	145	1789	23	1780	41	1773	74		1		1780.436585	82.50989561	1745.115673	572.729398		278	6.70	556	452483.0375	1.70		8.49	0.03	0.74	2.71	0.38
F1342 S 1235 3/2/2014 5:52:16 PM (Run: 1)		86.35507664	59.88594503	36.27949846	0.693484939	2041.092402		0.109018841	7.788175552	9.184921102	2.212945427	4.663951438	5.7	0.310690644	5.3	0.9228293	3.218635706	5.301460044	0.108874098	2.2	0		2091	155	1781	40	1761	48	1744	81		2		1760.882296	90.24439159	1712.830431	401.2555387		378	12.92	769	472853.2697	1.80		10.11	0.04	0.65	2.53	0.47
F1342 S 1232 3/2/2014 5:47:10 PM (Run: 1)		129.7890822	74.58134453	53.16732992	0.574634964	6221.526699		0.104045277	8.277950044	9.231542296	2.854763378	4.714646602	6.4	0.315661876	5.7	0.893573815	3.167946701	5.682444242	0.108324261	2.9	4.38011E-16		2001	158	1771	52	1770	53	1769	88		0		1769.85234	98.41736935	1751.598328	701.3596704		842	16.80	1763	481413.1432	1.37	0.02	4.22	0.09	1.67	6.35	0.37
F1342 S 1276 3/2/2014 7:23:25 PM (Run: 1)		168.6059878	159.0708612	72.41671203	0.943447283	4661.543978		0.083828836	7.05154427	9.250657062	1.426151504	4.713367219	3.7	0.316229647	3.5	0.924319986	3.162258849	3.454289728	0.108100429	1.4	-1.80292E-16		1627	110	1768	26	1770	31	1771	53		0		1769.609869	59.90838378	1789.148879	885.9578419		340	4.27	1404	577515.0077	4.28	0.09	34.96	0.07	2.04	4.93	1.52
F1342 XS 1301 3/2/2014 8:20:30 PM (Run: 1)		142.2659733	70.31070606	51.65228822	0.494220118	11471.19155		0.077406045	8.296176504	9.397351897	1.929524553	4.307361534	4.3	0.293572614	3.8	0.891270971	3.406312274	3.792367701	0.106412957	1.9	2.42756E-16		1507	120	1739	35	1695	35	1659	55		5		1694.959555	61.06703348	1668.890461	895.5394397		692	13.99	1927	602542.3929	1.71		7.23	0.12	1.96	4.94	0.65
F1342 S 1291 3/2/2014 7:59:38 PM (Run: 1)		189.6120184	124.9071747	72.27907289	0.658751359	4768.122225		0.077629406	8.443192942	9.410261192	1.896396447	4.371465127	5.3	0.298350947	4.9	0.933697371	3.351757413	4.945106407	0.106266976	1.9	1.8942E-16		1511	123	1736	35	1707	44	1683	73		3		1707.087176	80.89202693	1697.693336	581.1532555		180	13.66	631	564238.9266	2.11	0.08	12.98	0.21	2.37	6.47	1.54
F1342 S 1281 3/2/2014 7:35:33 PM (Run: 1)		226.3607616	80.43059015	79.81654232	0.355320373	26294.65252		0.074064429	7.5906489	9.472723235	1.11151241	4.295823727	4.4	0.295134532	4.2	0.967034996	3.388285316	4.221083048	0.105566264	1.1	3.7861E-16		1444	106	1724	20	1693	36	1667	62		3		1692.696847	68.28683663	1676.958563	629.0204481		966	12.24	2865	597794.0335	0.94	0.05	4.41	0.22	3.66	7.68	0.68
F1342 S 1226 3/2/2014 5:29:53 PM (Run: 1)	high U signal variance	150.4823878	78.88506522	56.93488803	0.524214603	1843.787995		0.09493742	8.024414783	9.512393523	2.286799646	4.309655044	5.7	0.297324737	5.3	0.916836712	3.363325939	5.251238303	0.105126012	2.3	-5.91698E-16		1833	141	1717	42	1695	47	1678	78		2		1695.301061	85.70111005	1667.63524	515.384931		197	7.90	642	476591.8129	1.84		8.66	0.13	1.40	2.40	0.85
F1342 M 1214 3/2/2014 5:05:42 PM (Run: 1)		60.38402022	33.49357981	22.98717026	0.554676215	964.8872599		0.102950176	7.750004913	9.622468372	2.58554109	4.200062479	4.6	0.293116974	3.9	0.83086852	3.411607273	3.860494561	0.103923438	2.6	1.77966E-16		1981	146	1695	48	1674	38	1657	56		2		1674.124361	62.27195296	1633.860168	668.2057152		168	2.46	357	460297.2953	1.34		8.21	0.07	1.64	3.23	0.36
F1342 S 1290 3/2/2014 7:57:56 PM (Run: 1)		173.0376586	105.9048534	66.62588201	0.612033555	13580.87838		0.083167565	7.289508729	9.828700973	1.25980642	4.254487028	4.8	0.303278799	4.6	0.964626672	3.297296097	4.609832084	0.101742845	1.3	0		1615	113	1656	23	1685	39	1708	69		-3		1684.480097	76.90898241	1714.791497	473.3282228		176	9.01	616	567814.7093	2.58		11.42		0.92	2.50	0.18
F1342 S 1289 3/2/2014 7:56:14 PM (Run: 1)		114.4280079	82.75369102	42.21660737	0.72319437	27722.24016		0.073998304	7.372282309	9.902880858	1.699314829	3.988870645	4.2	0.286490505	3.8	0.913772334	3.490517083	3.822463978	0.100980716	1.7	2.73472E-16		1443	103	1642	32	1632	34	1624	55		1		1631.97824	60.28422662	1641.125312	901.8152016		226	11.93	806	579260.914	3.41		8.58	0.04	1.11	3.57	0.11
F1342 S 1244 3/2/2014 6:11:14 PM (Run: 1)		75.60568939	68.09607039	30.1166139	0.90067389	1053.351213		0.095520112	8.005537488	9.984289076	3.93132163	3.920202523	8.1	0.283873188	7.1	0.87444339	3.522699715	7.086214916	0.100157356	3.9	-2.55057E-16		1844	141	1627	73	1618	66	1611	101		1		1617.900312	110.8869147	1582.196614	815.1812145		256	11.95	702	482996.0737	1.96		20.90	0.03	0.78	2.83	0.48
F1342 S 1284 3/2/2014 7:40:39 PM (Run: 1)		101.274818	81.99843111	37.38953437	0.809662587	1678.676902		0.073603336	7.497709434	9.994014154	1.787870244	3.882741815	4.4	0.281434411	4.0	0.912287233	3.553225758	3.98253522	0.100059894	1.8	0		1435	104	1625	33	1610	35	1599	56		2		1610.166003	61.74075023	1616.177393	995.3543261		237	14.40	741	606086.9525	2.50		17.42	0.03	0.99	2.82	0.31
F1342 S 1229 3/2/2014 5:42:03 PM (Run: 1)		184.4999432	132.4978906	71.24567934	0.71814597	10126.62391		0.098712961	6.893881832	10.07293292	1.92655916	3.925674713	4.8	0.286793284	4.4	0.917065803	3.486831995	4.430956799	0.099275951	1.9	4.16179E-16		1903	125	1611	36	1619	39	1625	64		-1		1618.9519	70.05498983	1599.022466	884.6988705		272	11.42	691	456230.713	2.57		11.66	0.03	0.92	3.07	0.13
F1342 S 1261 3/2/2014 6:50:50 PM (Run: 1)		75.26019654	31.47969662	23.54593546	0.418278161	932.9212977		0.083536973	8.767288283	10.52126549	2.480027799	3.325971185	6.3	0.253796242	5.8	0.91871372	3.940168664	5.769298866	0.095045601	2.5	-4.96604E-16		1622	137	1529	47	1487	49	1458	75		5		1487.35226	81.0212676	1449.048987	805.0164228		169	8.16	469	504476.2315	1.25		6.23	0.02	0.31	1.54	0.24
F1342 XS 1315 3/2/2014 8:51:31 PM (Run: 1)		46.45953912	41.45028591	16.69787139	0.892180308	826.6845382		0.066877261	7.291859319	10.55591379	3.380233143	3.576362427	5.6	0.273801664	4.4	0.795740574	3.65227875	4.44125089	0.094733627	3.4	0		1308	92	1523	64	1544	44	1560	62		-2		1544.204815	67.46185022	1590.437504	1005.042917		253	12.53	1005	620608.3734	1.45		10.82	0.02	0.95	3.60	0.82
F1342 S 1267 3/2/2014 7:08:06 PM (Run: 1)		174.098031	144.3074698	60.00140451	0.828886283	3798.251832		0.081766403	6.915813101	10.64358017	2.188624964	3.278571454	4.8	0.253087744	4.3	0.891513778	3.95119884	4.307322203	0.093953349	2.2	0		1589	106	1507	41	1476	38	1454	56		4		1476.118777	60.41845081	1438.957949	1046.468681		213	15.55	593	488757.8907	2.09		24.14	0.07	1.28	3.27	0.70
F1342 S 1242 3/2/2014 6:07:49 PM (Run: 1)		90.89023396	105.7855063	34.37282433	1.163881989	6948.286923		0.084651219	7.265441086	10.72498676	3.090347008	3.288606083	7.3	0.255804008	6.7	0.907056473	3.909242885	6.658098631	0.093240208	3.1	6.90657E-16		1642	115	1493	58	1478	57	1468	87		2		1478.423075	94.43745287	1438.902821	1720.416769		331	16.71	1175	484319.6515	2.42		22.70	0.10	3.02	5.61	1.76
F1342 S 1262 3/2/2014 6:52:32 PM (Run: 1)		169.7319469	289.8971508	72.14976673	1.707970457	2724.312566		0.083862139	8.192987063	10.79913255	2.439317678	3.293544926	7.0	0.257959299	6.6	0.938226004	3.876580538	6.614100276	0.09260003	2.4	0		1628	128	1480	46	1480	55	1479	87		0		1479.52842	94.62048848	1439.528866	2993.217066		260	12.00	863	500724.3745	1.57	0.03	28.67	0.20	3.02	5.07	2.14
F1342 S 1273 3/2/2014 7:18:19 PM (Run: 1)	reverse fractionation	369.9027427	450.5176114	119.4095709		15139.02624		0.065960306	7.395815558	10.80776366	1.86687386	2.831428728	4.2	0.221942359	3.8	0.898103768	4.505674367	3.812435069	0.09252608	1.9	0		1291	92	1478	35	1364	32	1292	45		13		1364.404153	47.01912856	1292.323005	1772.965885
F1342 S 1251 3/2/2014 6:30:12 PM (Run: 1)		91.44329038	123.8280471	34.91938544	1.354151262	15193.23675		0.084936827	8.184158332	10.82636591	2.945093958	3.111143269	6.3	0.244287608	5.6	0.885292775	4.093535513	5.606622133	0.092367098	2.9	-4.30318E-16		1648	130	1475	56	1435	49	1409	71		4		1435.623885	76.06436318	1359.90009	1793.106954		327	10.00	1366	494839.0556	1.63	0.03	31.11	0.54	8.00	14.40	5.63
F1342 S 1256 3/2/2014 6:38:42 PM (Run: 1)		154.1179072	110.7063115	53.72183991	0.718322183	49670.76873		0.088746364	7.521244689	10.84760322	2.706754701	3.314764508	6.5	0.260786555	5.9	0.908188106	3.834553515	5.873062789	0.092186263	2.7	-4.46968E-16		1719	124	1471	51	1485	50	1494	78		-2		1484.473877	85.01056644	1471.920786	807.0482476		225	10.63	642	482315.6941	2.48		18.04	0.03	0.88	2.64	0.36
F1342 S 1255 3/2/2014 6:37:00 PM (Run: 1)	high U signal variance	93.8809754	45.11087674	30.50259286	0.480511377	1394.658217		0.087760569	8.052116187	10.86405639	2.39499298	3.285870967	5.6	0.258905479	5.0	0.902500001	3.862413429	5.018648928	0.09204665	2.4	-1.47788E-16		1700	131	1468	45	1478	43	1484	67		-1		1477.669221	72.13878164	1470.555755	511.9307344		216	7.82	601	484497.9529	1.65		7.77	0.02	0.75	2.11	0.20
F1342 S 1269 3/2/2014 7:11:30 PM (Run: 1)		109.2421874	77.172018	35.93567239	0.706430545	1291.228383		0.079220335	7.619854675	10.8702157	2.492669343	3.170952956	4.9	0.249992331	4.3	0.862654096	4.000122708	4.251355282	0.091994495	2.5	0		1541	113	1467	47	1450	38	1438	55		2		1450.190329	59.06145171	1428.546079	684.2174931		357	2.90	1697	514324.6715	4.80		31.96	0.15	2.79	7.20	1.29
F1342 XS 1300 3/2/2014 8:18:48 PM (Run: 1)	high U signal variance	341.1497915	51.30618654	91.01209991		4349.172888		0.065510105	15.58013235	10.88481401	2.126394276	2.980714514	7.0	0.235309857	6.7	0.953230024	4.249715724	6.706273142	0.091871115	2.1	-7.47406E-16		1283	194	1465	40	1403	53	1362	82		7		1402.987684	87.62830493	1363.801602	290.4899794
F1342 S 1275 3/2/2014 7:21:43 PM (Run: 1)		113.0999021	61.76235062	35.981295	0.546086685	2307.095447		0.074216043	7.142004301	10.90380999	2.488933517	3.215498068	4.2	0.254287641	3.4	0.807996711	3.93255447	3.413262878	0.091711063	2.5	2.09097E-16		1447	100	1461	47	1461	33	1461	45		0		1460.902671	48.29365824	1461.529926	649.6112741		486	10.89	1259	552218.0065	1.75		7.28		0.84	2.60	0.07
F1342 XS 1299 3/2/2014 8:17:05 PM (Run: 1)		68.81642483	49.10362973	21.63106446	0.713545202	1672.815018		0.067368551	7.700184786	10.90703664	3.063127159	3.083203801	5.7	0.243897714	4.8	0.84199683	4.100079428	4.780773218	0.091683932	3.1	0		1318	98	1461	58	1429	44	1407	60		4		1428.668128	64.85695027	1415.620498	680.6478266		256	7.15	779	561961.6366	0.52		7.60	0.07	1.42	3.13	1.10
F1342 M 1216 3/2/2014 5:09:07 PM (Run: 1)		123.0023179	60.61339023	38.73745261	0.492782504	5499.428364		0.088551532	7.881014247	10.94393429	1.827340222	3.131821172	4.0	0.248581702	3.6	0.889224172	4.022822239	3.551946573	0.091374818	1.8	-1.3684E-16		1715	130	1454	35	1441	31	1431	46		2		1440.604534	49.07954243	1412.477793	601.7640244		210	10.27	701	471728.0636	1.93		10.14	0.03	0.85	2.67	0.22
F1342 S 1258 3/2/2014 6:45:44 PM (Run: 1)		212.629279	108.3477385	69.8988304	0.509561708	3530.897312		0.084609301	7.390363003	10.94715416	2.669990111	3.29631035	6.3	0.261714662	5.7	0.906570869	3.820955209	5.735136785	0.091347942	2.7	-2.3201E-16		1642	117	1454	51	1480	49	1499	77		-3		1480.063227	83.38371198	1489.009934	646.5373618		597	4.86	1244	484363.5034	3.27		30.66	0.04	0.92	2.82	0.89
F1342 S 1286 3/2/2014 7:44:04 PM (Run: 1)	high U signal variance	163.3081689	90.05286258	50.65306546	0.551429014	2731.28627		0.065288999	7.568440844	11.01188288	1.673866974	3.147052111	3.9	0.251341523	3.6	0.904910182	3.978650189	3.558952208	0.090810991	1.7	1.49093E-16		1278	94	1443	32	1444	30	1445	46		0		1444.271234	49.73655177	1457.590309	557.2429433		196	7.40	783	601301.5298	2.75		10.21	0.00	0.56	1.83	0.11
F1342 M 1215 3/2/2014 5:07:25 PM (Run: 1)	high U signal variance	57.31961608	25.46829572	17.53386248	0.444320766	2544.750991		0.086035917	8.459420519	11.02220134	3.095599845	3.069832449	5.9	0.245404057	5.1	0.853811488	4.074912263	5.077119694	0.090725978	3.1	0		1668	135	1441	59	1425	46	1415	64		2		1425.26357	69.35646605	1399.756587	559.5045475		156	3.91	430	471707.1611	2.22		7.64	0.01	0.16	1.24	0.07
F1342 S 1248 3/2/2014 6:25:06 PM (Run: 1)		110.5131143	76.60490891	34.57906966	0.693174827	5127.749359		0.080120836	7.416377681	11.03208399	2.867310436	2.94915423	5.5	0.235968358	4.7	0.852601474	4.237856338	4.678247804	0.090644705	2.9	3.97277E-16		1558	111	1439	55	1395	42	1366	58		5		1394.828473	61.48256382	1347.256266	801.9762638		149	5.14	519	468974.2439	1.35	0.04	13.97	0.16	1.65	2.87	1.45
F1342 S 1238 3/2/2014 6:01:00 PM (Run: 1)		133.1299237	92.1116543	43.6178235	0.69189294	7176.450085		0.085499355	8.35105116	11.04589875	2.160314298	3.073045028	4.9	0.246189036	4.4	0.89686416	4.061919318	4.380469783	0.090531339	2.2	1.87712E-16		1658	133	1437	41	1426	37	1419	56		1		1426.042909	59.99914026	1396.03341	898.7448217		158	5.01	480	483925.7135	1.02	0.03	17.27	0.05	0.89	1.90	0.61
F1342 S 1253 3/2/2014 6:33:36 PM (Run: 1)		163.3729537	69.66023316	50.28231886	0.426387793	3698.443296		0.086480312	9.191067534	11.05107687	3.015936491	3.099469947	7.5	0.248422401	6.8	0.914476229	4.025401881	6.815946983	0.090488919	3.0	0		1676	148	1436	58	1433	57	1430	87		0		1432.575807	94.17648366	1416.456085	530.0930943		186	6.17	552	480681.536	1.93		11.64	0.03	1.47	2.30	0.50
F1342 M 1210 3/2/2014 4:58:54 PM (Run: 1)		27.71236482	17.6918637	9.171935275	0.638410465	726.4429302		0.095184948	9.902516535	11.07926838	4.716854289	3.084244438	6.0	0.247832694	3.7	0.619207793	4.034980142	3.719577011	0.090258667	4.7	0		1838	174	1431	90	1429	46	1427	48		0		1428.79279	51.68685696	1391.412106	1256.299678		158	6.92	278	454218.0924	0.45		6.01	0.03	0.40	1.62	0.50
F1342 S 1233 3/2/2014 5:48:52 PM (Run: 1)	high U signal variance	83.47047577	45.45936614	25.59446054	0.544616114	1152.220802		0.082136365	7.929023226	11.07940034	2.434442129	2.989403645	4.5	0.240214678	3.8	0.842460565	4.162942954	3.806758217	0.090257592	2.4	0		1595	122	1431	46	1405	34	1388	48		3		1405.042869	50.95127602	1372.516905	624.508711		334	6.44	806	498715.8208	2.67	0.60	7.77	0.45	3.51	5.00	0.86
F1342 S 1263 3/2/2014 6:54:14 PM (Run: 1)		146.4278501	64.57007374	46.12571087	0.44096853	1163.985495		0.083178432	7.486728944	11.09142778	2.77722654	3.173797049	6.6	0.255308535	6.0	0.906815164	3.916829498	5.974521941	0.090159718	2.8	-2.14114E-16		1615	116	1429	53	1451	51	1466	78		-3		1450.707458	84.85977961	1457.158681	635.0542976		238	7.11	568	496270.8684	2.73		7.11		0.47	1.74	0.07
F1342 S 1292 3/2/2014 8:01:20 PM (Run: 1)		45.02122742	47.99488815	15.70638877	1.066050192	1510.1183		0.069438702	7.246345679	11.10138022	2.886027611	3.13146622	5.7	0.252129367	5.0	0.864623659	3.966217864	4.966616376	0.090078889	2.9	0		1357	95	1427	55	1440	44	1449	64		-2		1440.395717	69.72540959	1463.483816	1270.030544		327	13.52	1012	577482.5439	1.83	0.22	14.42	0.14	1.70	4.42	0.54
F1342 XS 1303 3/2/2014 8:23:54 PM (Run: 1)	high U signal variance	115.1730539	147.3660429	33.53256725	1.279518411	2551.068769		0.046574709	7.893702119	11.14987714	2.32543001	2.627758424	4.8	0.212497705	4.2	0.873630117	4.705933174	4.17510256	0.089687087	2.3	-1.82962E-16		920	71	1419	44	1308	35	1242	47		12		1308.925162	49.52375071	1304.470721	2256.760264		459	14.75	1465	598379.4467	2.69	0.11	10.18	0.20	2.06	6.46	3.18
F1342 S 1271 3/2/2014 7:14:55 PM (Run: 1)		342.4852762	230.7234991	91.06938129	0.673674214	41039.96727		0.055330029	10.11083678	11.21617316	1.318531069	2.580504681	6.8	0.209917228	6.6	0.980762945	4.763782427	6.624740505	0.089156969	1.3	4.06725E-16		1088	107	1408	25	1295	49	1228	74		13		1295.620857	77.5753846	1241.575387	1395.576241		673	17.37	2021	516412.282	7.22	0.83	31.69	2.38	19.85	19.67	8.64
F1342 XS 1312 3/2/2014 8:46:25 PM (Run: 1)		251.6020722	236.9193301	84.46010655	0.941643	17813.97368		0.062184989	7.599688823	11.24359541	1.815482654	3.120904076	4.3	0.254497989	3.9	0.904485725	3.92930413	3.850089443	0.088939522	1.8	2.54137E-16		1219	90	1403	35	1438	33	1462	50		-4		1437.698149	54.58817963	1493.290535	1185.041132		212	9.84	866	608815.0484	4.12		31.52	0.07	0.93	3.13	0.43
F1342 S 1257 3/2/2014 6:44:02 PM (Run: 1)	high U signal variance	133.3445903	97.7670678	44.13660263	0.733191107	25040.07491		0.085392466	11.38148411	11.40367657	3.171713954	2.983409393	8.2	0.246749607	7.6	0.92286862	4.05269136	7.600523998	0.087691017	3.2	2.94749E-16		1656	181	1376	61	1403	63	1422	97		-3		1403.274575	104.6378137	1397.946218	1083.21354		80	3.41	316	497306.2545	1.27		17.36	0.06	1.06	1.75	0.70
F1342 XS 1311 3/2/2014 8:44:43 PM (Run: 1)	high U signal variance	33.32815563	37.20522324	11.09272018	1.116330098	1151.227115		0.059920123	9.056519891	11.42428464	3.908724338	2.951328184	6.9	0.244537375	5.7	0.824881239	4.089354442	5.703518162	0.087532833	3.9	1.59361E-16		1176	103	1372	75	1395	52	1410	72		-3		1395.085319	77.96001308	1447.764598	2318.175777		176	14.60	1294	629201.0851	0.28		6.52	0.14	3.01	8.65	1.12
F1342 S 1222 3/2/2014 5:23:04 PM (Run: 1)	high U signal variance	40.21536657	25.27353199	12.77237974	0.628454597	622.3479437		0.083799578	7.523746536	11.43405286	2.7110591	2.937838526	5.2	0.2436278	4.4	0.850343048	4.104621894	4.38085194	0.087458053	2.7	0		1627	118	1371	52	1392	39	1406	55		-3		1391.621185	59.63913287	1386.580379	995.8560489		177	7.15	893	496122.6577	2.19		7.62	0.11	2.16	4.89	0.88
F1342 S 1249 3/2/2014 6:26:48 PM (Run: 1)		28.26151585	26.14228617	9.248354655	0.925013588	580.3220606		0.075938427	8.907036709	11.44650961	3.791315485	2.846970001	7.1	0.236349503	6.0	0.8442288	4.231022225	5.97171544	0.087362876	3.8	0		1479	127	1369	73	1368	53	1368	74		0		1368.013445	78.91730254	1352.944129	1102.405006		207	13.77	870	478096.1827	0.48		8.95	0.25	3.72	5.58	2.99
F1342 S 1280 3/2/2014 7:33:51 PM (Run: 1)		40.92325058	31.25770556	10.88773804		1544.545808		0.062038804	9.88039415	11.68525406	4.003708466	2.376753396	6.6	0.201428541	5.2	0.794044247	4.964539748	5.230023142	0.085577942	4.0	-3.39331E-16		1217	117	1329	77	1236	47	1183	57		11		1236.046153	59.26300946	1179.299025	1596.3412
F1342 XS 1304 3/2/2014 8:25:36 PM (Run: 1)		62.34562724	51.91744721	18.90404448	0.832735983	684.1013373		0.060885952	8.594433296	11.77458152	3.228504147	2.725434347	6.3	0.23274477	5.4	0.859617416	4.296551969	5.431729514	0.084928708	3.2	2.02591E-16		1195	100	1314	63	1335	47	1349	66		-3		1335.317703	70.89144357	1366.855589	1052.96643		165	8.40	454	615709.197	0.69	0.01	8.70	0.04	1.00	1.67	0.48
F1342 XS 1307 3/2/2014 8:37:54 PM (Run: 1)		120.7528877	71.0614622	34.42423211	0.588486649	6365.988949		0.057579863	7.792656637	11.78932172	2.082309747	2.708097959	4.4	0.231553801	3.9	0.879895488	4.318650763	3.855936817	0.084822522	2.1	-2.21236E-16		1132	86	1311	40	1331	32	1343	47		-2		1330.592045	50.06337214	1359.453368	761.7414918		152	8.51	650	612100.6972	2.10		6.21	0.04	0.78	2.44	0.34
F1342 XS 1317 3/2/2014 8:58:42 PM (Run: 1)	high U signal variance	69.89113827	45.04901093	19.70379258	0.644559697	1256.843795		0.057452577	8.223924781	11.7970399	2.337182101	2.638527586	5.3	0.225752939	4.8	0.898382798	4.429621183	4.78055665	0.084767027	2.3	3.17972E-16		1129	90	1310	45	1311	39	1312	57		0		1311.441962	60.52877574	1328.39941	664.6718232		236	7.83	1318	597430.6166	3.20	0.06	6.56	0.13	2.47	4.86	1.17
F1342 M 1217 3/2/2014 5:14:26 PM (Run: 1)		37.07681632	22.40615643	11.07527242	0.604317163	681.8134693		0.079938101	9.266868753	11.85721516	3.486212642	2.68531021	5.5	0.230927625	4.2	0.770307245	4.330361083	4.211335916	0.084336835	3.5	-2.41984E-16		1554	139	1300	68	1324	40	1339	51		-3		1324.310624	54.66965288	1321.482037	568.2163922		198	14.79	395	476718.5838	0.56		7.35	0.02	0.32	1.77	0.35
F1342 S 1274 3/2/2014 7:20:01 PM (Run: 1)		113.7893255	119.7740218	34.5031967	1.052594532	7756.13266		0.065222119	7.181649626	11.89493148	2.011367395	2.508128212	4.8	0.216376655	4.3	0.907633284	4.621570653	4.349072234	0.084069421	2.0	0		1277	89	1294	39	1274	35	1263	50		2		1274.478389	52.86216602	1260.46525	1464.409652		220	13.95	1106	554656.1867	0.65		9.57	0.18	3.93	7.17	0.90
F1342 S 1221 3/2/2014 5:21:22 PM (Run: 1)		213.7746284	107.1299164	55.79622934	0.50113485	15536.24756		0.072199028	7.708320943	11.95120215	2.039344997	2.393494514	5.7	0.207464003	5.3	0.934390748	4.820113292	5.348901312	0.083673591	2.0	-3.2569E-16		1409	105	1285	40	1241	41	1215	59		5		1240.854059	62.40376613	1201.846694	1025.507488		411	4.77	3227	494761.3276	16.49		16.18	0.08	2.62	10.72	1.80
F1342 XS 1308 3/2/2014 8:39:36 PM (Run: 1)		62.96101806	87.20245124	19.15717807	1.385022891	978.4925564		0.054831224	9.520617154	11.95491384	2.726649587	2.430107267	5.1	0.210702952	4.3	0.844828272	4.746017991	4.305399897	0.083647612	2.7	1.51317E-16		1079	100	1284	53	1252	37	1233	48		4		1251.699463	51.06240837	1265.577506	1765.576854		256	19.80	952	643338.9938	2.52		20.00	0.11	2.34	4.47	0.86
F1342 XS 1318 3/2/2014 9:00:24 PM (Run: 1)		400.6954916	429.7150892	115.3162092	1.07242307	10229.20044		0.057768057	8.059658875	11.96694787	2.358052908	2.401379373	6.1	0.208421684	5.6	0.92263188	4.797965266	5.640958573	0.083563496	2.4	2.67088E-16		1135	89	1282	46	1243	44	1220	63		5		1243.188789	66.12758323	1234.009873	1074.053608		163	28.14	326	574727.0257	2.44		10.16	0.05	1.21	3.23	0.59
F1342 S 1230 3/2/2014 5:43:46 PM (Run: 1)	high 206Pb/238U variance	46.2447259	37.81689391	12.91074243	0.817755824	1216.002441		0.067018396	9.320098391	12.02982742	4.077984733	2.374341272	9.2	0.207157787	8.3	0.897061552	4.827238273	8.278245832	0.083126712	4.1	-4.20956E-16		1311	118	1272	80	1235	66	1214	92		5		1235.075665	96.55687964	1202.140854	1719.711235
F1342 S 1272 3/2/2014 7:16:37 PM (Run: 1)		66.56116708	60.77515046	19.14976886	0.913072188	2760.153565		0.065699676	8.957957447	12.05311817	3.102786842	2.405331549	5.7	0.210267953	4.8	0.840331129	4.755836468	4.809991166	0.082966083	3.1	2.38048E-16		1286	112	1268	61	1244	41	1230	54		3		1244.30041	56.98663208	1222.802054	544.4031943		242	13.19	1099	532512.652	1.40	0.06	10.29	0.17	2.96	6.12	1.28
F1342 S 1287 3/2/2014 7:52:50 PM (Run: 1)	high U signal variance	102.7294824	66.50726386	28.32946732	0.647401917	1217.824782		0.059048079	7.284128919	12.08341769	2.025925259	2.503318228	5.3	0.21938381	4.8	0.922697974	4.558221497	4.848774805	0.082758043	2.0	0		1160	82	1264	40	1273	38	1279	56		-1		1272.95368	59.82938174	1289.284684	641.440306
F1342 S 1259 3/2/2014 6:47:26 PM (Run: 1)	high 206Pb/238U variance	48.43506748	70.90913406	14.45891011	1.464004032	2275.184579		0.063604495	9.6514578	12.13161237	4.03530179	2.156712829	11.1	0.189762141	10.3	0.931628196	5.269755037	10.34471089	0.082429274	4.0	-1.70214E-16		1246	117	1256	79	1167	77	1120	106		11		1167.60486	110.8177176	1090.009075	916.4502844		229	20.84	493	482372.188	1.50		21.25	0.09	1.88	3.54	0.86
F1342 S 1250 3/2/2014 6:28:30 PM (Run: 1)	high U signal variance	114.6150685	202.8890057	40.61320426	1.770177416	9523.05173		0.072011422	7.219820759	12.15988758	2.721631338	2.376995734	6.5	0.20963157	5.9	0.906948526	4.770273863	5.859773394	0.082237602	2.7	0		1405	98	1251	53	1236	46	1227	65		2		1235.7769	69.21950545	1173.73216	4432.616811		553	14.06	1854	474790.1337	3.58		88.05	0.22	4.20	12.13	1.73
F1342 S 1223 3/2/2014 5:24:46 PM (Run: 1)	high U signal variance	154.0139141	152.0177837	46.66999138	0.987039285	1808.107679		0.073170878	7.593274781	12.16628728	2.019781866	2.417002397	5.2	0.213272016	4.7	0.920106199	4.6888477	4.744858433	0.082194344	2.0	0		1427	105	1250	40	1248	37	1246	54		0		1247.677	56.99485099	1219.822698	1634.802529		205	11.35	561	484757.9399	1.30	0.04	18.66	0.17	2.50	4.05	1.58
F1342 S 1279 3/2/2014 7:32:09 PM (Run: 1)		84.48513521	193.7691511	29.48590989	2.293529514	4053.90559		0.055098804	7.013638866	12.16800922	2.739944985	2.331185371	5.0	0.205728787	4.2	0.837905555	4.860768476	4.206212901	0.082182712	2.7	1.54134E-16		1084	74	1250	54	1222	36	1206	46		4		1221.964536	48.83438346	1256.844455	3549.829613		326	23.34	1058	591184.733	3.12		46.97	0.15	3.66	6.87	1.47
F1342 M 1211 3/2/2014 5:00:36 PM (Run: 1)		69.73673755	50.02166712	18.58105844	0.717292906	5913.099267		0.073398644	7.593561769	12.22261514	3.407392645	2.229389826	5.5	0.197628183	4.3	0.781929786	5.060007059	4.274117627	0.081815552	3.4	0		1432	105	1241	67	1190	38	1163	45		6		1190.552528	47.78652096	1134.67167	1507.38027		262	12.91	666	450828.8852	2.89		7.88	0.04	1.12	2.86	0.28
F1342 S 1227 3/2/2014 5:38:39 PM (Run: 1)		33.68782114	12.32274571	8.515836962	0.365792304	760.4159532		0.069344828	10.42157918	12.22730194	3.95182785	2.370610418	6.1	0.210227512	4.6	0.760476555	4.756751342	4.62801449	0.081784191	4.0	1.94253E-16		1355	137	1240	77	1234	43	1230	52		1		1233.815241	54.98578423	1223.836821	478.9069585		111	8.07	502	474417.0382	1.42	0.06	2.15	0.03	0.81	2.12	0.55
F1342 S 1236 3/2/2014 5:53:58 PM (Run: 1)	high U signal variance	110.2348251	54.08608518	29.10432386	0.490644269	1505.108576		0.072652479	9.031523056	12.22778391	2.989568566	2.380463953	6.3	0.211109652	5.5	0.880378429	4.736874846	5.549457516	0.081780968	3.0	-2.14142E-16		1418	124	1240	59	1237	45	1235	62		0		1236.765588	66.06907296	1222.366088	645.3846923		325	13.29	452	489887.8042	0.76	0.35	6.49	0.17	1.46	2.78	0.21
F1342 S 1239 3/2/2014 6:02:43 PM (Run: 1)		40.64330979	60.82899217	13.37748366	1.496654492	587.6788684		0.068413514	7.966481707	12.2552716	3.863349834	2.358651011	6.7	0.209645407	5.5	0.81592384	4.769959014	5.452128346	0.081597539	3.9	-1.68667E-16		1338	103	1236	76	1230	48	1227	61		1		1230.202197	64.54967439	1200.441278	1616.260279		273	26.52	625	484127.9068	1.79		19.93	0.14	1.79	4.06	1.38
F1342 S 1219 3/2/2014 5:17:58 PM (Run: 1)	burn through?	154.6434938	80.97692897	40.8542395	0.523636184	9447.836596		0.070578002	7.595970227	12.29964199	2.665890935	2.355696201	5.6	0.210140846	5.0	0.881282604	4.758713107	4.971338949	0.081303179	2.7	5.36135E-16		1378	101	1229	52	1229	40	1230	56		0		1229.280645	58.95798352	1218.778888	535.1567577		223	6.90	750	478492.2316	1.44		7.63	0.04	1.29	2.89	0.69
F1342 M 1213 3/2/2014 5:04:00 PM (Run: 1)		145.2453704	74.24733857	38.40753582	0.511185578	1264.529163		0.076017391	7.421306481	12.32870142	2.376212996	2.333459782	4.7	0.208649035	4.1	0.863575048	4.79273724	4.069725373	0.081111543	2.4	-1.83688E-16		1481	106	1224	47	1223	33	1222	45		0		1222.539368	47.9547323	1203.218788	600.8180609		239	8.77	674	461224.4978	1.98		12.07	0.02	0.81	2.68	0.20
F1342 XS 1314 3/2/2014 8:49:49 PM (Run: 1)		202.1632181	228.4178544	57.97945521	1.129868512	1912.51798		0.05320648	6.814908284	12.34084101	1.894530918	2.342765659	5.0	0.209687399	4.7	0.92633371	4.769003795	4.658745682	0.081031755	1.9	-2.01261E-16		1048	70	1222	37	1225	36	1227	52		0		1225.348579	55.12369455	1257.415767	1596.061614		305	10.59	1450	601313.8531	3.63		28.81	0.08	2.48	5.53	1.29
F1342 S 1245 3/2/2014 6:12:55 PM (Run: 1)		80.82084473	65.66437367	21.82602119	0.812468292	11203.73164		0.070635377	8.002086169	12.34214819	3.787113945	2.197717428	8.8	0.196725806	7.9	0.901872132	5.083217185	7.906176429	0.081023172	3.8	0		1380	107	1222	74	1180	61	1158	84		5		1180.504688	87.92941216	1131.309365	1021.425452		220	19.06	819	485208.8806	1.61	0.04	9.18	0.10	2.08	4.98	0.61
F1342 XS 1316 3/2/2014 8:53:13 PM (Run: 1)	high U signal variance	73.07760904	60.25998922	20.31132479	0.824602638	1670.879057		0.058678693	7.9573278	12.34439423	2.971752861	2.371860827	6.4	0.212352663	5.7	0.886231336	4.709147454	5.685268577	0.08100843	3.0	0		1153	89	1222	58	1234	46	1241	64		-2		1234.105869	68.1405231	1251.810003	1221.596127		226	10.86	813	604376.383	2.23		9.78	0.04	0.80	3.20	0.20
F1342 XS 1313 3/2/2014 8:48:07 PM (Run: 1)	reverse fractionation	34.73819314	48.85794885	9.676142572	1.406462007	376.993913		0.047920998	10.13168781	12.36667142	4.127631883	2.178010103	5.7	0.19534911	4.0	0.692547135	5.119040471	3.96269491	0.080862503	4.1	-2.17204E-16		946	94	1218	81	1174	40	1150	42		6		1174.237975	43.9538656	1195.625237	2055.753562		159	16.89	784	611028.7043	1.68	0.01	4.19	0.13	2.53	4.98	0.71
F1342 XS 1295 3/2/2014 8:06:30 PM (Run: 1)	burn through?	380.3184438	192.5232912	103.6947856		15454.10796		0.068058972	8.338313393	12.38980162	2.128828474	2.452835727	8.7	0.220410125	8.4	0.969454186	4.536996651	8.414322769	0.080711543	2.1	0		1331	107	1214	42	1258	63	1284	98		-6		1258.059397	104.530857	1280.812441	649.0633695
F1342 XS 1305 3/2/2014 8:27:18 PM (Run: 1)	high U signal variance	70.60281767	116.9160973	23.47552997	1.655969282	2188.905255		0.054005349	7.164131077	12.40279612	2.537782075	2.500558601	4.8	0.224934135	4.0	0.847207564	4.445745864	4.047020215	0.08062698	2.5	0		1063	74	1212	50	1272	35	1308	48		-8		1271.923696	51.36631536	1372.224256	2098.707178		326	14.95	1106	614283.0366	3.08		34.83	0.07	1.29	3.28	0.85
F1342 XS 1296 3/2/2014 8:08:13 PM (Run: 1)	high U signal variance	123.5646341	93.48766682	33.13429625	0.756589193	1401.841424		0.063182304	7.415588493	12.46676974	3.398612301	2.256064421	5.8	0.203987784	4.7	0.809419719	4.902254344	4.684537988	0.080213241	3.4	2.23147E-16		1238	89	1202	67	1199	41	1197	51		0		1198.695191	54.1068539	1192.191568	939.2365419		218	9.55	832	511148.6487	3.70		10.95	0.02	1.10	4.31	0.21
F1342 S 1231 3/2/2014 5:45:28 PM (Run: 1)		208.5003687	164.0507519	59.69448886	0.786812766	3060.180843		0.070962812	7.447424614	12.47650586	1.699586824	2.357963745	5.4	0.213367772	5.1	0.948462904	4.686743403	5.086952259	0.080150646	1.7	-2.05461E-16		1386	100	1201	34	1230	38	1247	58		-4		1229.836342	61.28077852	1231.077981	1655.871509		298	9.36	882	486796.2667	3.14	0.09	21.14	0.13	2.19	3.10	0.93
F1342 S 1252 3/2/2014 6:31:54 PM (Run: 1)		85.84261225	97.08935146	25.23621536	1.131015808	1132.916646		0.068954426	7.909556295	12.5088856	2.429093189	2.204563942	6.5	0.200004628	6.0	0.927076131	4.999884295	6.007244238	0.079943173	2.4	0		1348	103	1196	48	1182	45	1175	65		2		1182.549381	67.97793286	1145.518743	1469.945971		307	16.94	876	489401.2446	3.15		31.33	0.08	2.20	4.81	1.11
F1342 S 1288 3/2/2014 7:54:32 PM (Run: 1)		59.10498217	54.22608764	15.77385686	0.917453752	1538.973784		0.054161491	7.946358084	12.5091672	2.730700134	2.21670582	4.4	0.201110703	3.5	0.78753751	4.972385779	3.489607198	0.079941373	2.7	0		1066	83	1196	54	1186	31	1181	38		1		1186.371982	39.78114359	1196.749586	1297.064297		191	20.46	726	593461.7053	1.10	0.02	7.24	0.04	1.29	2.85	0.50
F1342 S 1278 3/2/2014 7:30:27 PM (Run: 1)		226.4230993	168.1227941	56.64903195	0.742516089	1583.126586		0.055130696	7.433074727	12.51826086	1.842798788	2.134308402	3.9	0.19377596	3.4	0.880943511	5.160598876	3.430532728	0.079883301	1.8	2.8099E-16		1085	78	1194	36	1160	27	1142	36		4		1160.134154	37.66631964	1147.905242	713.7303335		262	9.16	1132	578499.9937	5.94		14.34	0.03	1.62	5.56	0.16
F1342 S 1265 3/2/2014 6:57:38 PM (Run: 1)		268.0074823	141.4739514	66.46378931	0.527873141	7012.544697		0.06286364	7.2533907	12.53823826	1.951013382	2.187709752	4.8	0.198941298	4.4	0.914199751	5.026608413	4.401122394	0.079756021	2.0	-4.13749E-16		1232	87	1191	39	1177	34	1170	47		2		1177.198179	49.56549274	1165.015498	760.705476		227	7.11	1074	492613.3974	9.64		13.61	0.08	1.70	4.17	0.24
F1342 M 1207 3/2/2014 4:53:48 PM (Run: 1)		260.5853198	144.214577	63.93755049	0.553425562	2603.984725		0.067763227	6.924673169	12.54005279	1.662917829	2.116655413	3.6	0.192507765	3.2	0.888438684	5.19459566	3.218770347	0.079744481	1.7	1.65936E-16		1325	89	1191	33	1154	25	1135	33		5		1154.409258	35.11957574	1120.048123	584.8162549		252	11.09	826	439382.6318	5.05	0.05	11.26	0.03	0.77	3.31	0.24
F1342 S 1282 3/2/2014 7:37:15 PM (Run: 1)		81.03453483	50.43731935	19.92301505	0.622417584	7507.727859		0.053892598	9.165439509	12.56667026	2.674269663	2.157781744	5.1	0.196664721	4.4	0.853929454	5.084796078	4.388329836	0.079575574	2.7	1.51365E-16		1061	95	1186	53	1168	36	1157	46		2		1167.642853	48.92114034	1165.841545	913.2712447		193	17.54	782	608816.099	2.54	0.01	4.47		0.65	2.48	0.19
F1342 XS 1309 3/2/2014 8:41:19 PM (Run: 1)		89.6834463	87.67136352	24.61072989	0.977564614	3335.835017		0.053422291	7.745268859	12.57163345	1.857528537	2.257361441	5.7	0.205821878	5.4	0.945227387	4.85856998	5.379041207	0.079544158	1.9	-3.55566E-16		1052	79	1186	37	1199	40	1207	59		-2		1199.023376	62.61705708	1228.696353	1377.679447		260	11.02	1069	602347.279	4.96	0.04	10.73	0.09	1.34	4.70	0.27
F1342 M 1212 3/2/2014 5:02:18 PM (Run: 1)		38.50387161	45.99972073	11.95981026	1.194677803	339.0145025		0.073586022	7.470601432	12.59915961	2.866271639	2.257938655	5.2	0.206325279	4.3	0.83467503	4.846715843	4.343961487	0.079370373	2.9	2.85336E-16		1435	103	1181	57	1199	37	1209	48		-2		1199.182947	50.77104331	1167.693592	1687.269083		302	32.09	611	462861.9504	1.02	0.01	13.23	0.09	2.69	4.70	1.46
F1342 S 1293 3/2/2014 8:03:02 PM (Run: 1)	high U signal variance	120.1742778	94.14823663	29.13676883	0.78343085	880.716705		0.050107907	7.646107374	12.70317716	2.888682002	2.044558169	5.7	0.188369485	4.9	0.85943803	5.308715466	4.856121351	0.078720464	2.9	-2.53263E-16		988	74	1165	57	1130	39	1113	50		5		1130.636238	51.97249618	1126.684768	968.3400862		221	9.65	1034	582612.5669	5.19	0.10	10.33	0.24	3.85	8.69	4.31
F1342 S 1237 3/2/2014 5:59:18 PM (Run: 1)		48.3868488	41.08471434	13.45538918	0.849088448	394.2593661		0.067808328	9.109834325	12.7066764	4.614414085	2.218122766	6.8	0.204416654	5.0	0.738220301	4.891969327	5.049892785	0.078698785	4.6	0		1326	117	1165	91	1187	48	1199	55		-3		1186.677793	58.64430869	1183.282402	957.6187547		200	20.75	604	484966.9967	0.97		4.21	0.06	1.26	2.72	0.28
Experiment 15 - 2 March 2014:
Isotope ratio and date errors include systematic calibration errors of 0.40% (207Pb/206Pb) and 1.96% (206Pb/238U) (2 sigma); truncated analyses include systematic calibration erros of 0.64% (207Pb/206Pb) and 2.38% (206Pb/238U) (2 sigma).
Trace element concentrations were deleted from analyses known to have intersected inclusions of non-zircon minerals based on P and Ti.
Ablation used a laser spot size of 25 microns, and a laser firing repetition rate of 10 Hz.
Activity of TiO2 for Ti-in-Zircon temperature calculation is 0.8.
[truncated: 38 more columns]
